# Supplementary material for: Spectroscopic, Spectrometric and Computational Studies of New Lasalocid Derivatives and Their Complexes with Selected Metal Cations
Source: MDPI journal article supplement (doi:10.3390/molecules28248085), 2023-12-14
Supplement: s1 [file s1]

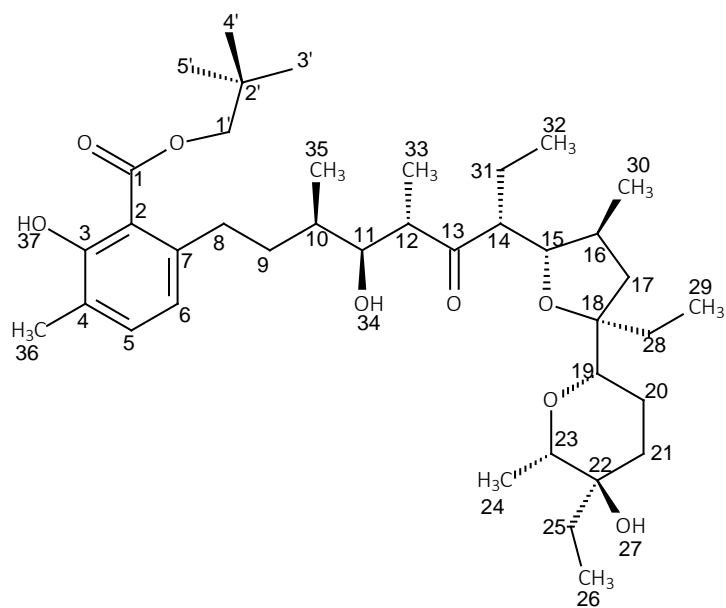

Fig. S1 Structure of neopenthyl lasalocid ester.

Table S1  $^1\text{H}$  NMR and  $^{13}\text{C}$  NMR chemical shifts (ppm) of LasNeopent in chloroform

| No of Atom | LasH         |                 | LasNeo       |                 | $\otimes^1\text{H}$ | $\otimes^{13}\text{C}$ |
|------------|--------------|-----------------|--------------|-----------------|---------------------|------------------------|
|            | $^1\text{H}$ | $^{13}\text{C}$ | $^1\text{H}$ | $^{13}\text{C}$ |                     |                        |
| 1          | –            | 171.37          | –            | 172.32          | –                   | 0.95                   |
| 2          | –            | 111.54          | –            | 111.80          | –                   | 0.26                   |
| 3          | –            | 160.29          | –            | 160.69          | –                   | 0.40                   |
| 4          | –            | 124.08          | –            | 124.25          | –                   | 0.17                   |
| 5          | 7.13         | 134.99          | 7.18         | 134.97          | 0.05                | -0.03                  |
| 6          | 6.63         | 121.8           | 6.73         | 121.43          | 0.1                 | -0.37                  |
| 7          | –            | 143.43          | –            | 143.21          | –                   | -0.22                  |
| 8          | 2.81; 3.00   | 33.75           | 2.90; 3.01   | 31.62           | 0.09; 0.01          | -2.13                  |
| 9          | 2.19         | 35.38           | 1.84         | 35.32           | -0.35               | -0.06                  |
| 10         | 1.76         | 33.95           | 1.6          | 33.63           | -0.16               | -0.32                  |
| 11         | 3.47         | 70.56           | 3.48         | 70.60           | 0.01                | 0.04                   |
| 12         | 2.9          | 48.99           | 2.93         | 49.65           | 0.03                | 0.66                   |
| 13         | –            | 215.28          | –            | 215.45          | –                   | 0.17                   |
| 14         | 2.71         | 55.16           | 2.82         | 55.06           | 0.11                | -0.10                  |
| 15         | 3.79         | 84.51           | 3.83         | 85.24           | 0.04                | 0.73                   |
| 16         | ~1.6         | 36.1            | 1.6          | 36.12           | 0                   | 0.02                   |
| 17         | 1.50; 1.82   | 39.22           | 1.64; 1.84   | 39.54           | 0.14; 0.02          | 0.32                   |
| 18         | –            | 71.43           | –            | 71.77           | –                   | 0.34                   |
| 19         | 3.55         | 72.56           | 3.95         | 74.07           | 0.4                 | 1.51                   |
| 20         | 1.45; 1.66   | 20.64           | 1.49; 1.71   | 21.22           | 0.03; 0.05          | 0.58                   |
| 21         | 1.26         | 29.86           | 1.33         | 30.15           | 0.07                | 0.29                   |
| 22         | –            | 85.8            | –            | 85.89           | –                   | 0.09                   |
| 23         | 3.74         | ~77             | 3.79         | 75.45           | 0.05                | –                      |
| 24         | 1.16         | 14.02           | 1.17         | 14.24           | 0.01                | 0.22                   |
| 25         | 1.55         | 30.61           | 1.33         | 30.75           | -0.22               | 0.14                   |
| 26         | 0.84         | 6.39            |              | 6.58            | -0.84               | 0.19                   |

|    |            |       |       |       |          |      |
|----|------------|-------|-------|-------|----------|------|
| 27 | ~2.4       | –     | 2.23  | –     | -0.17    | –    |
| 28 | ~1.4       | 29.3  | 1.6   | 29.49 | 0.2      | 0.19 |
| 29 | 0.79       | 8.54  | 0.86  | 8.59  | 0.07     | 0.05 |
| 30 | 1          | 15.99 | 1.06  | 16.22 | 0.06     | 0.23 |
| 31 | 1.40; 1.87 | 17.91 | 1.88  | 18.58 | 1 signal | 0.67 |
| 32 | 0.84       | 12.53 | 0.9   | 12.90 | 0.06     | 0.37 |
| 33 | 0.9        | 13.49 | 0.98  | 13.53 | 0.08     | 0.04 |
| 34 | ~3.4       | –     | 3.48  | –     | 0.08     | –    |
| 35 | 0.9        | 12.37 | 0.9   | 12.41 | 0        | 0.04 |
| 36 | 2.19       | 15.87 | 2.23  | 16.10 | 0.04     | 0.23 |
| 37 | 11.2       | –     | 11.36 | –     | 0.16     | –    |

  

| No of Atom | Neo            |                 | LasNeo         |                 | ⊙ <sup>1</sup> H | ⊙ <sup>13</sup> C |
|------------|----------------|-----------------|----------------|-----------------|------------------|-------------------|
|            | <sup>1</sup> H | <sup>13</sup> C | <sup>1</sup> H | <sup>13</sup> C |                  |                   |
| 1'         | 3.287          | 71.769          | 3.79           | 77.36           | 0.503            | 5.591             |
| 2'         | –              | 32.149          | –              | 26.92           | –                | -5.229            |
| 3'         | 1.021          | 24.931          | 1.06           | 26.14           | –                | 1.209             |
| 4'         | 1.021          | 24.931          | 1.06           | 26.14           | –                | 1.209             |
| 5'         | 1.021          | 24.931          | 1.06           | 26.14           | –                | 1.209             |
| 6'         | 3.93           | –               | –              | –               | –                | –                 |

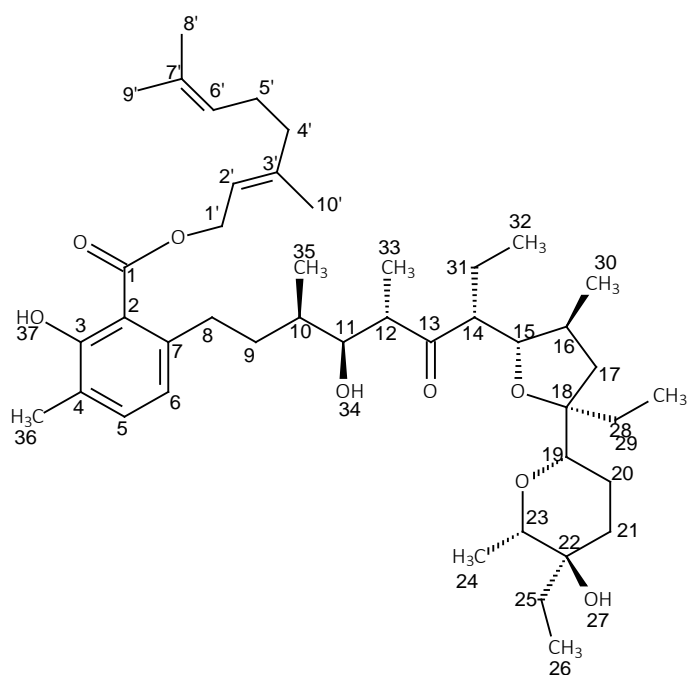

Fig. S2 Structure of geraniol lasalocid ester.

Table S2 <sup>1</sup>H NMR and <sup>13</sup>C NMR chemical shifts (ppm) of LasGeran in chloroform

| No of Atom | LasH           |                 | LasGeran       |                 | ⊙ <sup>1</sup> H | ⊙ <sup>13</sup> C |
|------------|----------------|-----------------|----------------|-----------------|------------------|-------------------|
|            | <sup>1</sup> H | <sup>13</sup> C | <sup>1</sup> H | <sup>13</sup> C |                  |                   |
| 1          | –              | 171.37          | –              | 171.96          | –                | 0.59              |
| 2          | –              | 111.54          | –              | 111.59          | –                | 0.05              |
| 3          | –              | 160.29          | –              | 160.80          | –                | 0.51              |

|    |            |        |            |        |              |       |
|----|------------|--------|------------|--------|--------------|-------|
| 4  | –          | 124.08 | –          | 124.02 | –            | -0.06 |
| 5  | 7.13       | 134.99 | 7.16       | 135.01 | 0.03         | 0.02  |
| 6  | 6.63       | 121.8  | 6.69       | 121.81 | 0.06         | 0.01  |
| 7  | –          | 143.43 | –          | 143.39 | –            | -0.04 |
| 8  | 2.81; 3.00 | 33.75  | 2.72; 2.93 | 34.39  | -0.09; -0.07 | 0.64  |
| 9  | 2.19       | 35.38  | 1.8        | 37.31  | -0.39        | 1.93  |
| 10 | 1.76       | 33.95  | 1.76       | 30.88  | 0            | -3.07 |
| 11 | 3.47       | 70.56  | 3.48       | 70.62  | 0.01         | 0.06  |
| 12 | 2.9        | 48.99  | 2.93       | 49.56  | 0.03         | 0.57  |
| 13 | –          | 215.28 | –          | 215.57 | –            | 0.29  |
| 14 | 2.71       | 55.16  | 2.82       | 55.07  | 0.11         | -0.09 |
| 15 | 3.79       | 84.51  | 3.83       | 85.25  | 0.04         | 0.74  |
| 16 | ~1.6       | 36.1   | 1.6        | 35.56  | 0            | -0.54 |
| 17 | 1.50; 1.82 | 39.22  | 1.60; 2.11 | 39.67  | 0.1; 0.29    | 0.45  |
| 18 | –          | 71.43  | –          | 71.83  | –            | 0.40  |
| 19 | 3.55       | 72.56  | 3.95       | 74.16  | 0.4          | 1.60  |
| 20 | 1.45; 1.66 | 20.64  | 1.49; 1.60 | 21.22  | 0.04; -0.06  | 0.58  |
| 21 | 1.26       | 29.86  | 1.41       | 29.46  | 0.15         | -0.40 |
| 22 | –          | 85.8   | –          | 85.82  | –            | 0.02  |
| 23 | 3.74       | ~77    | 3.79       | 77.06  | 0.05         | –     |
| 24 | 1.16       | 14.02  | 1.17       | 13.92  | 0.01         | -0.1  |
| 25 | 1.55       | 30.61  | 1.6        | 30.29  | 0.05         | -0.32 |
| 26 | 0.84       | 6.39   | 0.75       | 6.58   | -0.09        | 0.19  |
| 27 | ~2.4       | –      | 2.23       | –      | -0.17        | –     |
| 28 | ~1.4       | 29.3   | 1.6        | 30.07  | 0.20         | 0.77  |
| 29 | 0.79       | 8.54   | 0.69       | 8.57   | -0.1         | 0.03  |
| 30 | 1          | 15.99  | 1.06       | 15.68  | 0.06         | -0.31 |
| 31 | 1.40; 1.87 | 17.91  | 1.92       | 17.83  | 1 signal     | -0.08 |
| 32 | 0.84       | 12.53  | 0.94       | 13.34  | 0.1          | 0.81  |
| 33 | 0.9        | 13.49  | 0.94       | 13.62  | 0.04         | 0.13  |
| 34 | ~3.4       | –      | 3.78       | –      | 0.38         | –     |
| 35 | 0.9        | 12.37  | 0.86       | 12.76  | -0.04        | 0.39  |
| 36 | 2.19       | 15.87  | 2.23       | 15.68  | 0.04         | -0.19 |
| 37 | 11.2       | –      | 11.48      | –      | 0.28         | –     |

  

| No of Atom | Geran          |                 | LasGeran       |                 | ⊗ <sup>1</sup> H | ⊗ <sup>13</sup> C |
|------------|----------------|-----------------|----------------|-----------------|------------------|-------------------|
|            | <sup>1</sup> H | <sup>13</sup> C | <sup>1</sup> H | <sup>13</sup> C |                  |                   |
| 1'         | 5.41           | 123.98          | 5.07           | 117.89          | -0.34            | -6.09             |
| 2'         | 4.14           | 58.84           | 4.18           | 59.52           | 0.04             | 0.68              |
| 3'         | –              | 139.35          | –              | 139.89          | –                | 0.54              |
| 4'         | 2.23           | 32.09           | 2.88           | 36.72           | 0.65             | 4.63              |
| 5'         | 1.95           | 26.68           | 2.07           | 26.20           | 0.12             | -0.48             |
| 6'         | 5.09           | 124.73          | 4.17           | 124.18          | -0.92            | -0.55             |
| 7'         | –              | 132.20          | –              | 131.88          | –                | -0.32             |
| 8'         | 1.68           | 25.66           | 1.72           | 25.62           | 0.04             | -0.04             |
| 9'         | 1.61           | 17.64           | 1.64           | 17.43           | 0.03             | -0.21             |
| 10'        | 1.68           | 23.42           | 1.64           | 25.62           | -0.04            | 2.20              |
| 11'        | 1.57           | –               | –              | –               | –                | –                 |

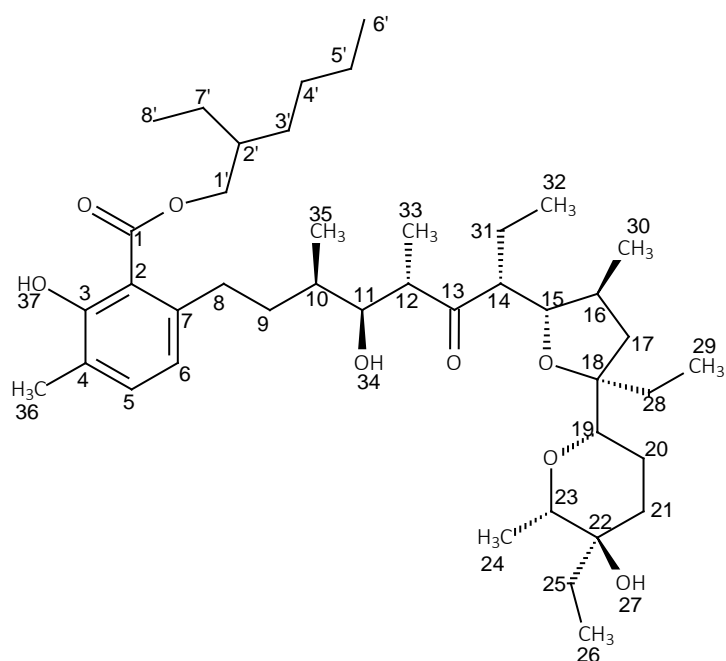

Fig. S3 Structure of 2-ethylhexanol lasalocid ester.

Table S3  $^1\text{H}$  NMR and  $^{13}\text{C}$  NMR chemical shifts (ppm) of LasEtHex in chloroform

| No of Atom | LasH         |                 | LasEtHex     |                 | $\delta^1\text{H}$ | $\delta^{13}\text{C}$ |
|------------|--------------|-----------------|--------------|-----------------|--------------------|-----------------------|
|            | $^1\text{H}$ | $^{13}\text{C}$ | $^1\text{H}$ | $^{13}\text{C}$ |                    |                       |
| 1          | –            | 171.37          | –            | 172.37          | –                  | 1.00                  |
| 2          | –            | 111.54          | –            | 111.67          | –                  | 0.13                  |
| 3          | –            | 160.29          | –            | 160.83          | –                  | 0.54                  |
| 4          | –            | 124.08          | –            | 124.25          | –                  | 0.17                  |
| 5          | 7.13         | 134.99          | 7.17         | 135.00          | 0.04               | 0.01                  |
| 6          | 6.63         | 121.8           | 6.69         | 121.67          | 0.06               | -0.13                 |
| 7          | –            | 143.43          | –            | 143.34          | –                  | -0.09                 |
| 8          | 2.81; 3.00   | 33.75           | 2.72; 2.97   | 33.80           | -0.09; -0.03       | 0.05                  |
| 9          | 2.19         | 35.38           | 1.88         | 35.35           | -0.31              | -0.03                 |
| 10         | 1.76         | 33.95           | 1.6          | 34.39           | -0.16              | 0.44                  |
| 11         | 3.47         | 70.56           | 3.48         | 71.81           | 0.01               | 1.25                  |
| 12         | 2.9          | 48.99           | 2.93         | 49.65           | 0.03               | 0.66                  |
| 13         | –            | 215.28          | –            | 215.54          | –                  | 0.26                  |
| 14         | 2.71         | 55.16           | 2.85         | 55.07           | 0.14               | -0.09                 |
| 15         | 3.79         | 84.51           | 3.83         | 85.29           | 0.04               | 0.78                  |
| 16         | ~1.6         | 36.1            | 1.6          | 36.25           | 0                  | 0.15                  |
| 17         | 1.50; 1.82   | 39.22           | 1.60; 1.84   | 39.58           | 0.1; 0.02          | 0.36                  |
| 18         | –            | 71.43           | –            | 70.62           | –                  | -0.81                 |
| 19         | 3.55         | 72.56           | 3.95         | 74.16           | 0.4                | 1.60                  |
| 20         | 1.45; 1.66   | 20.64           | 1.50; 1.72   | 21.24           | 0.05; 0.06         | 0.60                  |
| 21         | 1.26         | 29.86           | 1.33         | 29.48           | 0.07               | -0.38                 |

|    |            |       |       |       |          |       |
|----|------------|-------|-------|-------|----------|-------|
| 22 | –          | 85.8  | –     | 85.86 | –        | 0.06  |
| 23 | 3.74       | ~77   | 3.79  | 77.36 | 0.05     | –     |
| 24 | 1.16       | 14.02 | 0.9   | 13.56 | -0.26    | -0.46 |
| 25 | 1.55       | 30.61 | 1.6   | 30.75 | 0.05     | 0.14  |
| 26 | 0.84       | 6.39  | 0.86  | 6.59  | 0.02     | 0.20  |
| 27 | ~2.4       | –     | 2.39  | –     | -0.01    | –     |
| 28 | ~1.4       | 29.3  | 1.41  | 29.25 | 0.01     | -0.05 |
| 29 | 0.79       | 8.54  | 1.06  | 8.58  | 0.27     | 0.04  |
| 30 | 1          | 15.99 | 1.06  | 16.08 | 0.06     | 0.09  |
| 31 | 1.40; 1.87 | 17.91 | 1.92  | 18.65 | 1 signal | 0.74  |
| 32 | 0.84       | 12.53 | 0.86  | 12.42 | 0.02     | -0.11 |
| 33 | 0.9        | 13.49 | 0.9   | 12.90 | 0        | -0.59 |
| 34 | ~3.4       | –     | 3.58  | –     | 0.18     | –     |
| 35 | 0.9        | 12.37 | 0.79  | 11.25 | -0.11    | -1.12 |
| 36 | 2.19       | 15.87 | 2.23  | 16.24 | 0.04     | 0.37  |
| 37 | 11.2       | –     | 11.48 | –     | 0.28     | –     |

  

| No of<br>Atom | EtHex          |                 | LasEtHex       |                 | ® <sup>1</sup> H | ® <sup>13</sup> C |
|---------------|----------------|-----------------|----------------|-----------------|------------------|-------------------|
|               | <sup>1</sup> H | <sup>13</sup> C | <sup>1</sup> H | <sup>13</sup> C |                  |                   |
| 1'            | 1.647          | 42.07           | 4.34           | 58.32           | 2.693            | 16.25             |
| 2'            | 3.522          | 65.15           | 3.56           | 65.46           | 0.038            | 0.31              |
| 3'            | 1.479          | 30.23           | 1.84           | 38.87           | 0.361            | 8.64              |
| 4'            | 1.39           | 29.24           | 1.33           | 30.47           | -0.06            | 1.23              |
| 5'            | 1.29           | 23.19           | 1.41           | 23.9            | 0.12             | 0.71              |
| 6'            | 0.89           | 14.12           | 1.21           | 14.24           | 0.32             | 0.12              |
| 7'            | 1.25           | 23.43           | 1.41           | 23.24           | 0.16             | -0.19             |
| 8'            | 0.89           | 11.09           | 0.79           | 11.01           | -0.1             | -0.08             |
| 9'            | 2.26           | –               | –              | –               | –                | –                 |

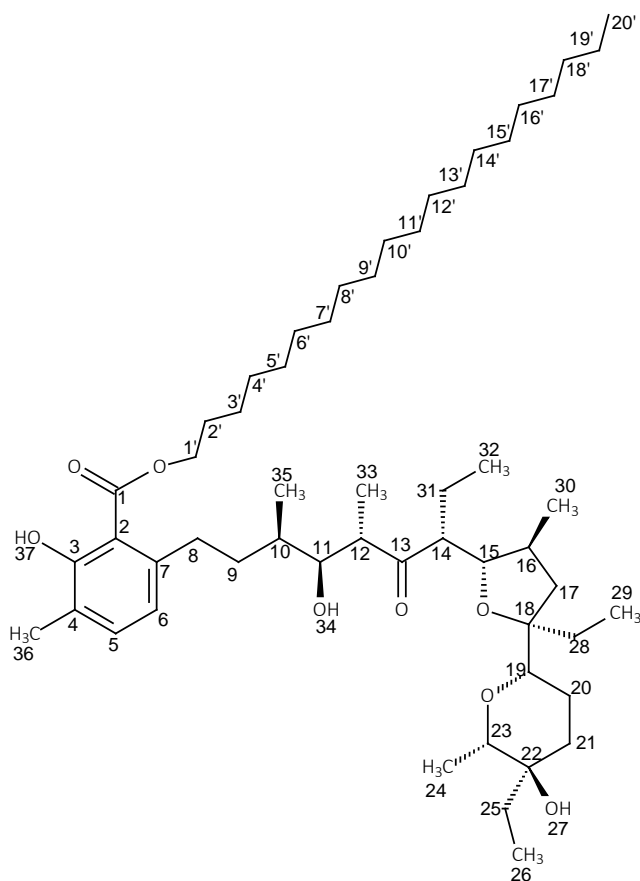

Fig. S4 Structure of eicosanol lasalocid ester.

Table S4  $^1\text{H}$  NMR and  $^{13}\text{C}$  NMR chemical shifts (ppm) of LasEico in chloroform

| No of Atom | LasH         |                 | LasEico      |                 | $\delta^1\text{H}$ | $\delta^{13}\text{C}$ |
|------------|--------------|-----------------|--------------|-----------------|--------------------|-----------------------|
|            | $^1\text{H}$ | $^{13}\text{C}$ | $^1\text{H}$ | $^{13}\text{C}$ |                    |                       |
| 1          | –            | 171.37          | –            | 172.18          | –                  | 0.81                  |
| 2          | –            | 111.54          | –            | 111.54          | –                  | 0                     |
| 3          | –            | 160.29          | –            | 160.9           | –                  | 0.61                  |
| 4          | –            | 124.08          | –            | 124.24          | –                  | 0.16                  |
| 5          | 7.13         | 134.99          | 7.17         | 135.04          | 0.04               | 0.05                  |
| 6          | 6.63         | 121.8           | 6.69         | 121.76          | 0.06               | -0.04                 |
| 7          | –            | 143.43          | –            | 143.51          | –                  | 0.08                  |
| 8          | 2.81; 3.00   | 33.75           | 2.72; 2.93   | 34.19           | -0.09; -0.07       | 0.44                  |
| 9          | 2.19         | 35.38           | 2.08         | 35.34           | -0.11              | -0.04                 |
| 10         | 1.76         | 33.95           | 1.84         | 32.95           | 0.08               | -1                    |
| 11         | 3.47         | 70.56           | 3.48         | 71.81           | 0.01               | 1.25                  |
| 12         | 2.9          | 48.99           | 2.93         | 49.59           | 0.03               | 0.6                   |
| 13         | –            | 215.28          | –            | 215.45          | –                  | 0.17                  |
| 14         | 2.71         | 55.16           | 2.82         | 55.05           | 0.11               | -0.11                 |
| 15         | 3.79         | 84.51           | 3.83         | 85.27           | 0.04               | 0.76                  |
| 16         | ~1.6         | 36.1            | 1.7          | 36.51           | 0.1                | 0.41                  |
| 17         | 1.50; 1.82   | 39.22           | 1.60; 1.85   | 39.56           | 0.1; 0.03          | 0.34                  |
| 18         | –            | 71.43           | –            | 70.6            | –                  | -0.83                 |

| 19            | 3.55           | 72.56           | 3.95           | 74.22           | 0.4              | 1.66              |
|---------------|----------------|-----------------|----------------|-----------------|------------------|-------------------|
| 20            | 1.45; 1.66     | 20.64           | 1.50; 1.92     | 21.23           | 0.05; 0.26       | 0.59              |
| 21            | 1.26           | 29.86           | 1.29           | 29.71           | 0.03             | -0.15             |
| 22            | –              | 85.8            | –              | 85.88           | –                | 0.08              |
| 23            | 3.74           | ~77             | 3.79           | 77.06           | 0.05             | –                 |
| 24            | 1.16           | 14.02           | 1.21           | 14.28           | 0.05             | 0.26              |
| 25            | 1.55           | 30.61           | 1.27           | 30.76           | -0.28            | 0.15              |
| 26            | 0.84           | 6.39            | 0.86           | 6.59            | 0.02             | 0.2               |
| 27            | ~2.4           | –               | 2.3            | –               | -0.1             | –                 |
| 28            | ~1.4           | 29.3            | 1.29           | 29.71           | -0.11            | 0.41              |
| 29            | 0.79           | 8.54            | 0.94           | 8.59            | 0.15             | 0.05              |
| 30            | 1              | 15.99           | 1.06           | 16.06           | 0.06             | 0.07              |
| 31            | 1.40; 1.87     | 17.91           | 1.88           | 18.59           | 1 signal         | 0.68              |
| 32            | 0.84           | 12.53           | 0.86           | 12.9            | 0.02             | 0.37              |
| 33            | 0.9            | 13.49           | 0.94           | 13.63           | 0.04             | 0.14              |
| 34            | ~3.4           | –               | 3.5            | –               | 0.1              | –                 |
| 35            | 0.9            | 12.37           | 0.86           | 12.43           | -0.04            | 0.06              |
| 36            | 2.19           | 15.87           | 2.23           | 16.23           | 0.04             | 0.36              |
| 37            | 11.2           | –               | 11.52          | –               | 0.32             | –                 |
| No of<br>Atom | Eico           |                 | LasEico        |                 | @ <sup>1</sup> H | @ <sup>13</sup> C |
|               | <sup>1</sup> H | <sup>13</sup> C | <sup>1</sup> H | <sup>13</sup> C |                  |                   |
| 1'            | 3.63           | 63.11           | 4.36           | 66              | 0.73             | 2.89              |
| 2'            | 1.56           | 32.89           | 1.27           | 32.07           | -0.29            | -0.82             |
| 3'            | 1.26           | 25.82           | 1.29           | 25.88           | 0.03             | 0.06              |
| 4'            | 1.26           | 29.51           | 1.29           | 29.52           | 0.03             | 0.01              |
| 5'            | 1.26           | 29.76           | 1.29           | 29.71           | 0.03             | -0.05             |
| 6'            | 1.26           | 29.76           | 1.29           | 29.71           | 0.03             | -0.05             |
| 7'            | 1.26           | 29.76           | 1.29           | 29.71           | 0.03             | -0.05             |
| 8'            | 1.26           | 29.76           | 1.29           | 29.71           | 0.03             | -0.05             |
| 9'            | 1.26           | 29.76           | 1.29           | 29.71           | 0.03             | -0.05             |
| 10'           | 1.26           | 29.76           | 1.29           | 29.71           | 0.03             | -0.05             |
| 11'           | 1.26           | 29.76           | 1.29           | 29.71           | 0.03             | -0.05             |
| 12'           | 1.26           | 29.76           | 1.29           | 29.71           | 0.03             | -0.05             |
| 13'           | 1.26           | 29.76           | 1.29           | 29.71           | 0.03             | -0.05             |
| 14'           | 1.26           | 29.76           | 1.29           | 29.71           | 0.03             | -0.05             |
| 15'           | 1.26           | 29.76           | 1.29           | 29.71           | 0.03             | -0.05             |
| 16'           | 1.26           | 29.76           | 1.29           | 29.71           | 0.03             | -0.05             |
| 17'           | 1.26           | 29.43           | 1.29           | 29.44           | 0.03             | 0.01              |
| 18'           | 1.26           | 31.98           | 1.29           | 30.12           | 0.03             | -1.86             |
| 19'           | 1.26           | 22.74           | 1.29           | 22.84           | 0.03             | 0.1               |
| 20'           | 0.89           | 14.13           | 0.89           | 14.25           | 0                | 0.12              |
| 21'           | 1.41           | –               | –              | –               | –                | –                 |

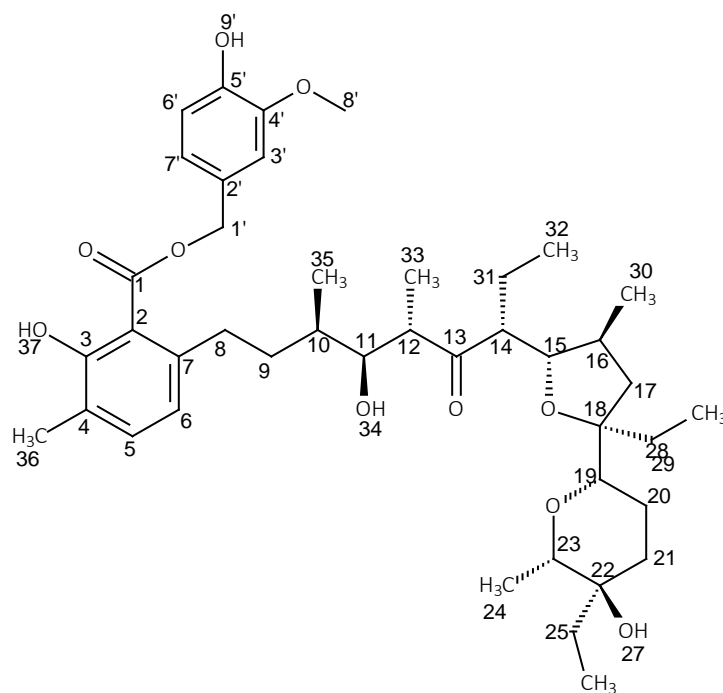

Fig. S5 Structure of vanillyl lasalocid ester.

Table S5  $^1\text{H}$  NMR and  $^{13}\text{C}$  NMR chemical shifts (ppm) of LasVanillyl in chloroform

| No of Atom | LasH         |                 | LasVanillyl  |                 | $\delta^1\text{H}$ | $\delta^{13}\text{C}$ |
|------------|--------------|-----------------|--------------|-----------------|--------------------|-----------------------|
|            | $^1\text{H}$ | $^{13}\text{C}$ | $^1\text{H}$ | $^{13}\text{C}$ |                    |                       |
| 1          | –            | 171.37          | –            | 164.68          | –                  | -6.69                 |
| 2          | –            | 111.54          | –            | 111.14          | –                  | -0.40                 |
| 3          | –            | 160.29          | –            | 151.22          | –                  | -9.07                 |
| 4          | –            | 124.08          | –            | 124.41          | –                  | 0.33                  |
| 5          | 7.13         | 134.99          | 7.25         | 135.98          | 0.12               | 0.99                  |
| 6          | 6.63         | 121.8           | 7.18         | 122.41          | 0.55               | 0.61                  |
| 7          | –            | 143.43          | –            | 141.32          | –                  | -2.11                 |
| 8          | 2.81; 3.00   | 33.75           | 2.72; 2.85   | 32.68           | -0.09; -0.15       | -1.07                 |
| 9          | 2.19         | 35.38           | 2.27         | 34.15           | 0.08               | -1.23                 |
| 10         | 1.76         | 33.95           | 1.96         | 31.46           | 0.2                | -2.49                 |
| 11         | 3.47         | 70.56           | 3.75         | 70.73           | 0.28               | 0.17                  |
| 12         | 2.9          | 48.99           | 2.93         | 49.39           | 0.03               | 0.40                  |
| 13         | –            | 215.28          | –            | 216.01          | –                  | 0.73                  |
| 14         | 2.71         | 55.16           | 2.78         | 55.46           | 0.07               | 0.30                  |
| 15         | 3.79         | 84.51           | 3.79         | 85.00           | 0                  | 0.49                  |
| 16         | ~1.6         | 36.1            | 1.53         | 35.81           | -0.07              | -0.29                 |
| 17         | 1.50; 1.82   | 39.22           | 1.60; 1.84   | 39.63           | 0.1; 0.02          | 0.41                  |
| 18         | –            | 71.43           | –            | 71.84           | –                  | 0.41                  |
| 19         | 3.55         | 72.56           | 3.64         | 74.91           | 0.09               | 2.35                  |
| 20         | 1.45; 1.66   | 20.64           | 1.49; 1.72   | 21.11           | 0.04; 0.06         | 0.47                  |
| 21         | 1.26         | 29.86           | 1.27         | 29.94           | 0.01               | 0.08                  |
| 22         | –            | 85.8            | –            | 85.78           | –                  | -0.02                 |



|    |            |       |       |       |          |       |
|----|------------|-------|-------|-------|----------|-------|
| 23 | 3.74       | ~77   | 3.79  | 77.00 | 0.05     | –     |
| 24 | 1.16       | 14.02 | 1.17  | 14.23 | 0.01     | 0.21  |
| 25 | 1.55       | 30.61 | 1.6   | 30.73 | 0.05     | 0.12  |
| 26 | 0.84       | 6.39  | 0.75  | 6.60  | -0.09    | 0.21  |
| 27 | ~2.4       | –     | 2.23  | –     | -0.17    | –     |
| 28 | ~1.4       | 29.3  | 1.43  | 29.38 | 0.03     | 0.08  |
| 29 | 0.79       | 8.54  | 0.82  | 8.62  | 0.03     | 0.08  |
| 30 | 1          | 15.99 | 1.02  | 15.68 | 0.02     | -0.31 |
| 31 | 1.40; 1.87 | 17.91 | 1.88  | 18.49 | 1 signal | 0.58  |
| 32 | 0.84       | 12.53 | 0.82  | 12.83 | -0.02    | 0.30  |
| 33 | 0.9        | 13.49 | 0.86  | 13.59 | -0.04    | 0.10  |
| 34 | ~3.4       | –     | 3.6   | –     | 0.20     | –     |
| 35 | 0.9        | 12.37 | 0.67  | 11.70 | -0.23    | -0.67 |
| 36 | 2.19       | 15.87 | 2.23  | 16.20 | 0.04     | 0.33  |
| 37 | 11.2       | –     | 11.59 | –     | 0.39     | –     |

  

| No of Atom | Vanillyl       |                 | LasVanillyl    |                 | ⊙ <sup>1</sup> H | ⊙ <sup>13</sup> C |
|------------|----------------|-----------------|----------------|-----------------|------------------|-------------------|
|            | <sup>1</sup> H | <sup>13</sup> C | <sup>1</sup> H | <sup>13</sup> C |                  |                   |
| 1'         | 6.717          | 114.32          | 7.26           | 126.25          | 0.543            | 11.93             |
| 2'         | –              | 132.99          | –              | 133.04          | –                | 0.05              |
| 3'         | 6.885          | 109.99          | 6.79           | 110.55          | -0.095           | 0.56              |
| 4'         | –              | 146.71          | –              | 146.17          | –                | -0.54             |
| 5'         | –              | 145.32          | –              | 144.49          | –                | -0.83             |
| 6'         | 4.382          | 65.27           | 4.65           | 65.09           | 0.268            | -0.18             |
| 7'         | 6.708          | 120.25          | 6.84           | 119.15          | 0.132            | -1.1              |
| 8'         | 3.751          | 55.94           | 3.6            | 53.88           | -0.151           | -2.06             |
| 9'         | 8.79           | –               | –              | –               | –                | –                 |
| 10'        | 5.02           | –               | –              | –               | –                | –                 |

a)

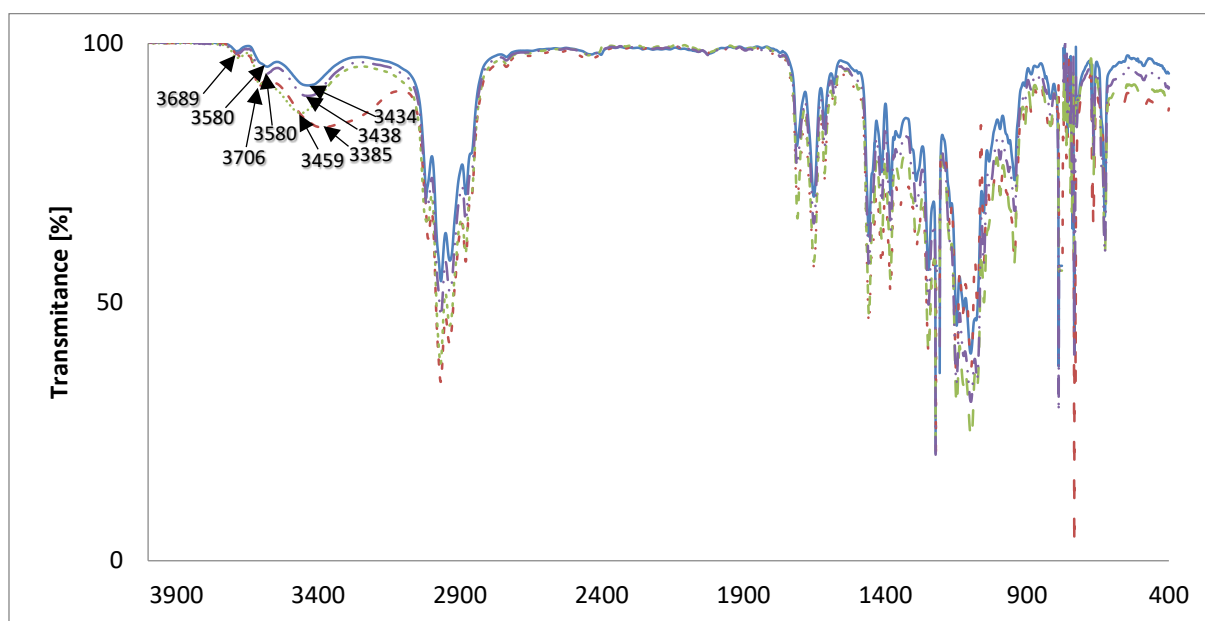

b)

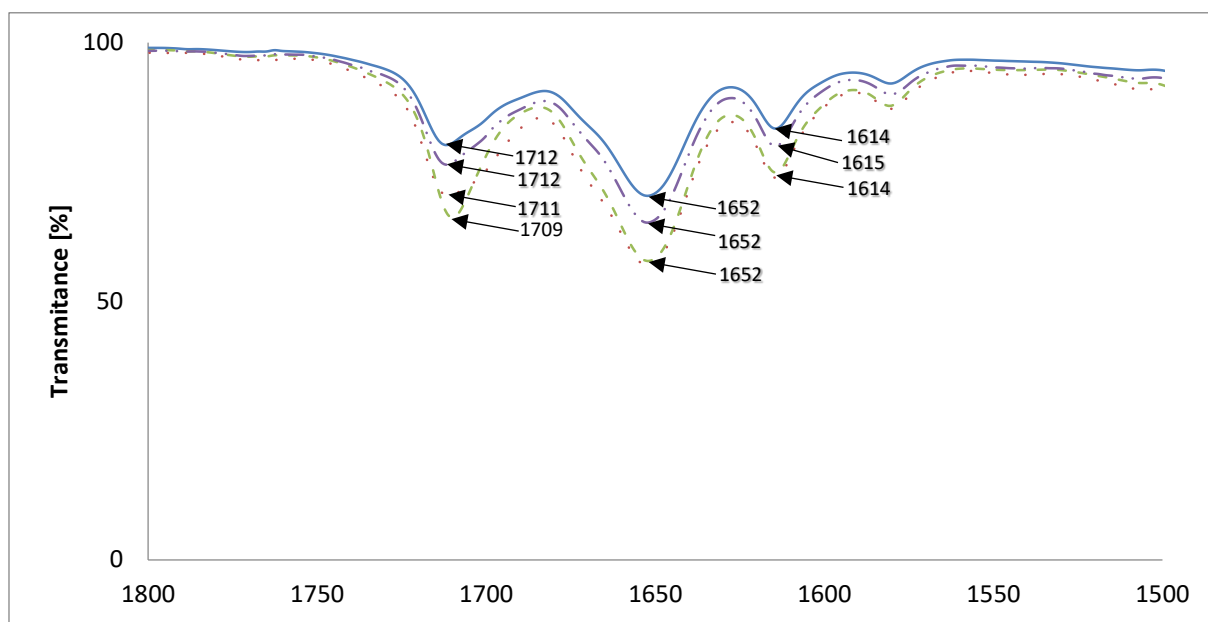

Fig. S6 The FT-IR spectra of (—) LasGeran and its 1:1 complexes with cations: (---) Li<sup>+</sup>; (···) Na<sup>+</sup>; (-.-) K<sup>+</sup>; (a) 4000–400 cm<sup>-1</sup>; (b) 1800–1500 cm<sup>-1</sup>

a)

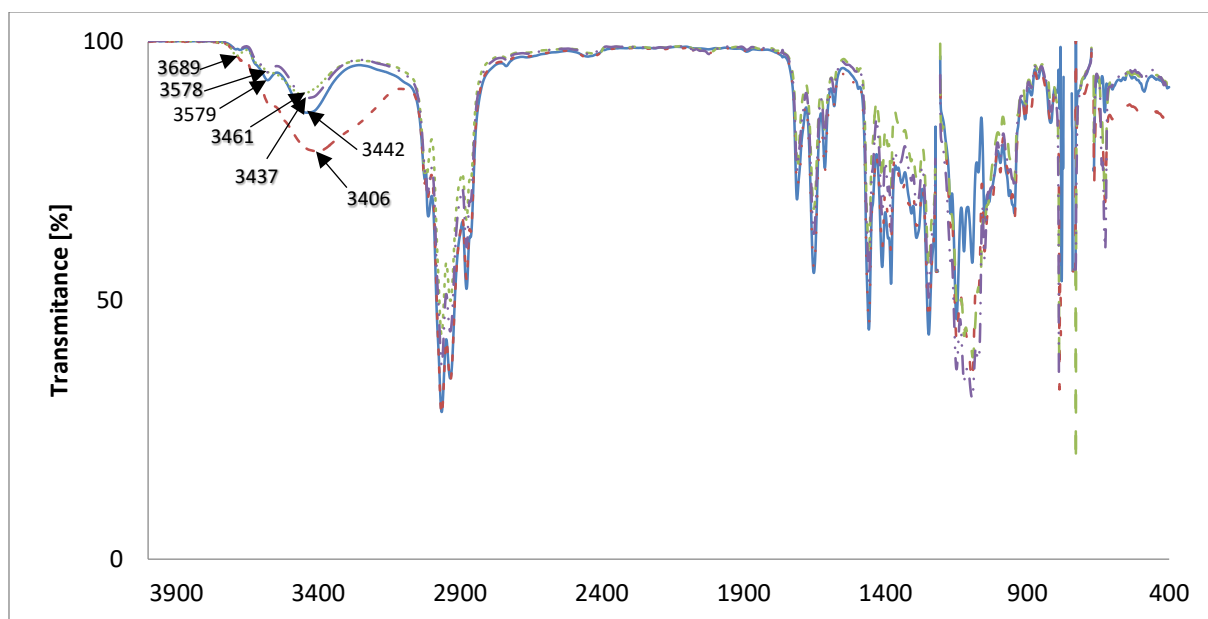

b)

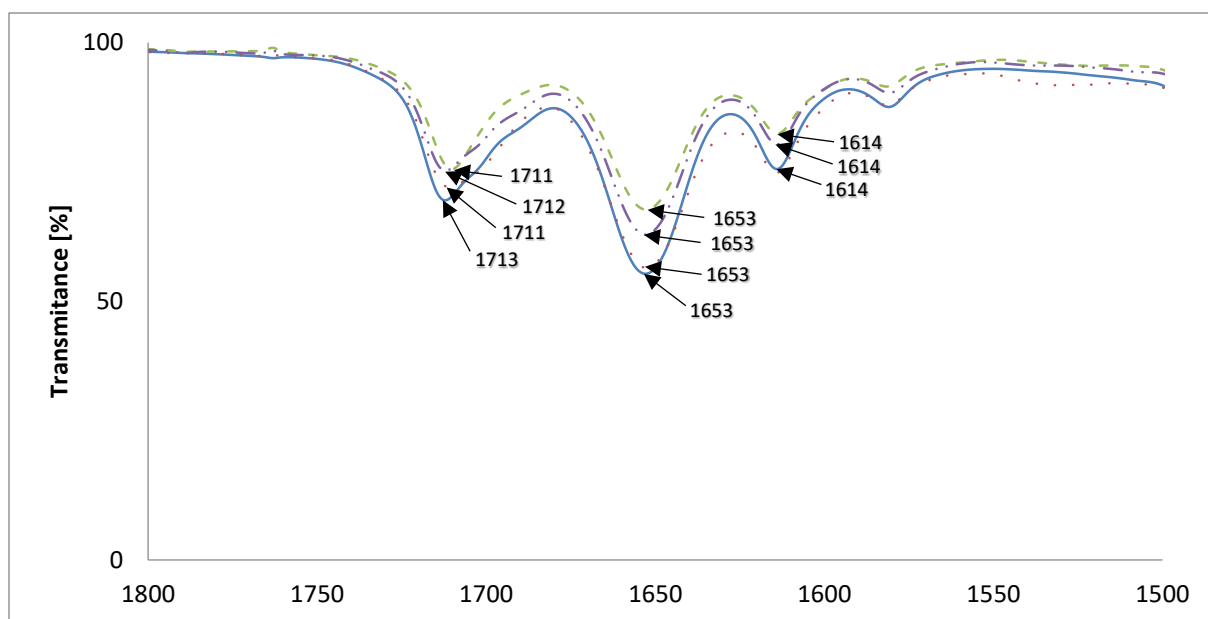

Fig. S7 The FT-IR spectra of (—) LasEtHex and its 1:1 complexes with cations: (---) Li<sup>+</sup>; (···) Na<sup>+</sup>; (-·-·-) K<sup>+</sup>; (a) 4000–400 cm<sup>-1</sup>; (b) 1800–1500 cm<sup>-1</sup>

a)

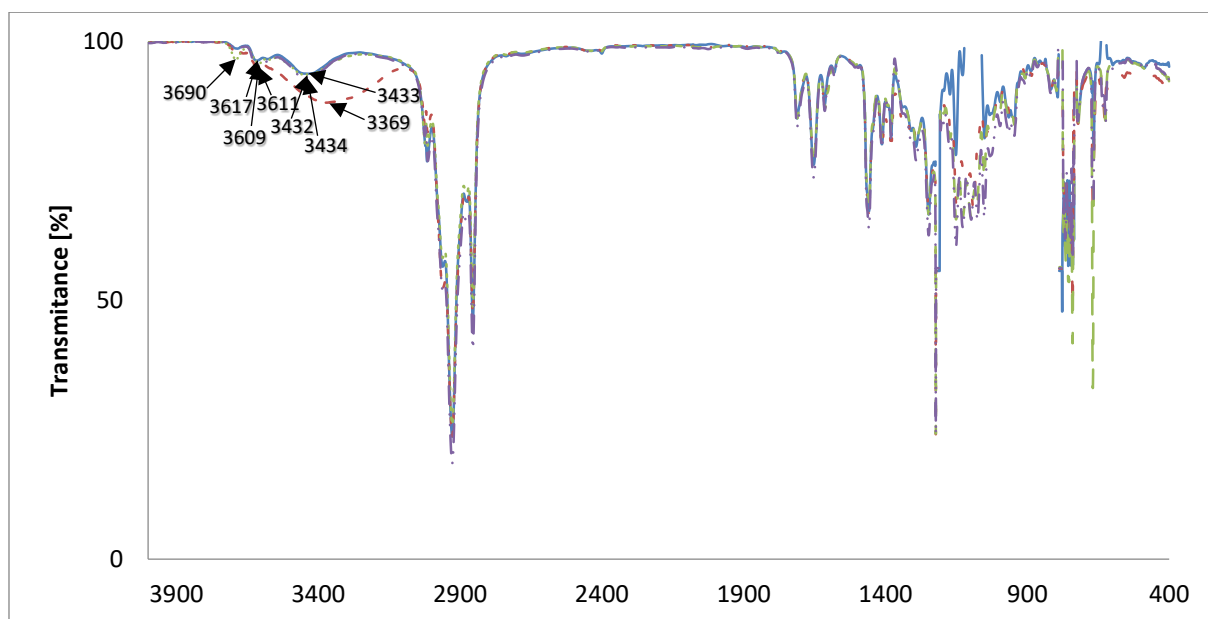

b)

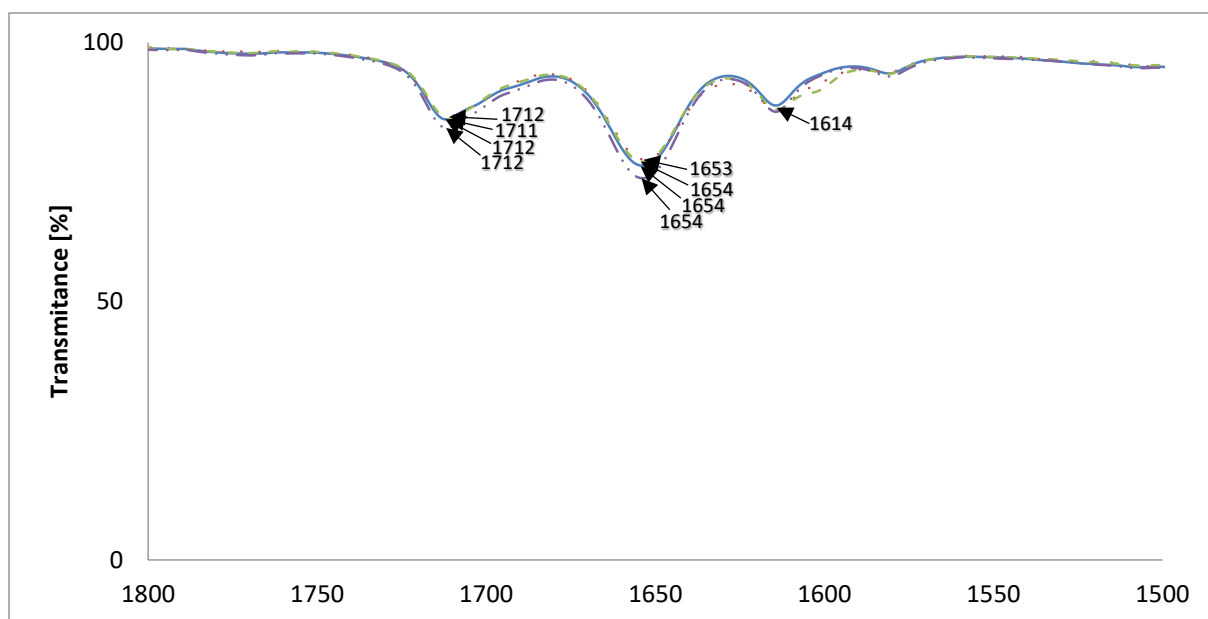

Fig. S8 The FT-IR spectra of (—) LasEico and its 1:1 complexes with cations: (---) Li<sup>+</sup>; (···) Na<sup>+</sup>; (-·-) K<sup>+</sup>; (a) 4000–400 cm<sup>-1</sup>; (b) 1800–1500 cm<sup>-1</sup>
